# Supplementary material for: Recombinant RNA-Dependent RNA Polymerase Complex of Ebola Virus
Source: PubMed Central journal article supplement (PMC5838098; doi:10.1038/s41598-018-22328-3), 2018-03-05
Supplement: 41598_2018_22328_MOESM1_ESM.pdf [file 41598_2018_22328_MOESM1_ESM.pdf]

## Supplementary Information

### Recombinant RNA-Dependent RNA Polymerase Complex of Ebola Virus

Egor P. Tchesnokov<sup>1</sup>, Parisa Raeisimakiani<sup>1</sup>, Marianne Ngunjiri<sup>1</sup>, David Marchant<sup>1,2</sup> and Matthias Götze<sup>1,2\*</sup>

<sup>1</sup>Department of Medical Microbiology and Immunology, University of Alberta, Edmonton, Alberta, Canada. <sup>2</sup>Li Ka Shing Institute of Virology at University of Alberta, Edmonton, Alberta, Canada. Correspondence and requests for materials should be addressed to M.G. should be addressed to M.G. (email: [gotte@ualberta.ca](mailto:gotte@ualberta.ca))

**Supplementary Table 1.** Detailed information regarding viral RdRp production and RNA synthesis assays.

| VIRAL INFO                               |                                                                                                                                                                                                                                                                                                                                                                                                                                                                                                                                                                                                                                                                                                                               |                                                                          |                                             |                                               |                                               |           |
|------------------------------------------|-------------------------------------------------------------------------------------------------------------------------------------------------------------------------------------------------------------------------------------------------------------------------------------------------------------------------------------------------------------------------------------------------------------------------------------------------------------------------------------------------------------------------------------------------------------------------------------------------------------------------------------------------------------------------------------------------------------------------------|--------------------------------------------------------------------------|---------------------------------------------|-----------------------------------------------|-----------------------------------------------|-----------|
| family                                   | <i>Flaviviridae</i>                                                                                                                                                                                                                                                                                                                                                                                                                                                                                                                                                                                                                                                                                                           |                                                                          | <i>Orthomyxoviridae</i>                     | <i>Pneumoviridae</i>                          | <i>Filoviridae</i>                            |           |
| genus                                    | <i>Hepacivirus</i>                                                                                                                                                                                                                                                                                                                                                                                                                                                                                                                                                                                                                                                                                                            | <i>Flavivirus</i>                                                        | <i>Influenza B</i>                          | <i>Orthopneumovirus</i>                       | <i>Ebolavirus</i>                             |           |
| species                                  | <i>Hepatitis C virus</i>                                                                                                                                                                                                                                                                                                                                                                                                                                                                                                                                                                                                                                                                                                      | <i>Zika virus</i>                                                        | <i>Influenza B virus</i>                    | <i>Human respiratory syncytial virus</i>      | <i>Zaire ebolavirus</i>                       |           |
| virus                                    | Hepatitis C                                                                                                                                                                                                                                                                                                                                                                                                                                                                                                                                                                                                                                                                                                                   | Zika                                                                     | Influenza B                                 | human respiratory syncytial virusA2           | Ebola                                         |           |
| strain or isolate                        | AJ238799                                                                                                                                                                                                                                                                                                                                                                                                                                                                                                                                                                                                                                                                                                                      | ZikaSPH2015: KU321639                                                    | B/Memphis/13/03                             | A2                                            | KR534507.1                                    |           |
| protein                                  | CAB46677.1                                                                                                                                                                                                                                                                                                                                                                                                                                                                                                                                                                                                                                                                                                                    | ALU33341.1                                                               | PA:AAU94844<br>PB1:AAU94857<br>PB2:AAU94870 | P:AAB59853<br>L: AAA84898                     | VP35: AKG65095<br>VP30:AKG65100<br>L:AKG65102 |           |
| EXPRESSION CONSTRUCT, PROTEIN PRODUCTION |                                                                                                                                                                                                                                                                                                                                                                                                                                                                                                                                                                                                                                                                                                                               |                                                                          |                                             |                                               |                                               |           |
| coding region                            | CAB46677.1<br>2420-3010                                                                                                                                                                                                                                                                                                                                                                                                                                                                                                                                                                                                                                                                                                       | synthetic DNA codon-optimized for expression in insect cells (GenScript) |                                             |                                               |                                               |           |
| design                                   | Ferrari <i>et al.</i> ,<br>1999                                                                                                                                                                                                                                                                                                                                                                                                                                                                                                                                                                                                                                                                                               | adapted from<br>Zhao <i>et al.</i> ,<br>2015                             | based on<br>Reich <i>et al.</i> ,<br>2014   | adapted from<br>Reich <i>et al.</i> ,<br>2014 |                                               |           |
| design details                           | Polyprotein:<br>2420-2989<br>[SMS-RPR]                                                                                                                                                                                                                                                                                                                                                                                                                                                                                                                                                                                                                                                                                        | Polyprotein:<br>2525-3416<br>[GETL-LGEE]                                 |                                             |                                               |                                               |           |
| vector                                   | pET21b                                                                                                                                                                                                                                                                                                                                                                                                                                                                                                                                                                                                                                                                                                                        | pFastBac1, Bacmid                                                        |                                             |                                               |                                               |           |
| composition                              | NS5b<br>Δ21<br>C-terminus                                                                                                                                                                                                                                                                                                                                                                                                                                                                                                                                                                                                                                                                                                     | NS5 (domains):<br>Methyltransferase<br>linker<br>RdRp                    | PA<br>PB1<br>PB2                            | P<br>L                                        | vp35<br>vp30<br>L                             | vp35<br>L |
| host                                     | <i>E. coli</i>                                                                                                                                                                                                                                                                                                                                                                                                                                                                                                                                                                                                                                                                                                                | <i>Spodoptera frugiperda (Sf9)</i>                                       |                                             |                                               |                                               |           |
| sequence alignment                       | <p>Structure-based alignment of viral RdRp (Chimera, UCSF<sup>1</sup>), <i>top panel</i>. Sequence-based alignment of vesicular stomatitis, RSV and Ebola L proteins (T-coffee<sup>2</sup> - <a href="http://tcoffee.vital-it.ch/apps/tcoffee/do:regular%20coffee">http://tcoffee.vital-it.ch/apps/tcoffee/do:regular coffee</a>), <i>bottom panel</i>. The alignments were rendered using ESPrpt<sup>3</sup> - <a href="http://esprpt.ibcp.fr">http://esprpt.ibcp.fr</a>. Numbers above the alignment refer to the HCV residues that are in contact with the 2'-OH of the incoming nucleotide (pdb:4WTA<sup>4</sup>). Number below the alignment (742) refers to the Ebola Lprotein residue that was mutated to alanine.</p> |                                                                          |                                             |                                               |                                               |           |
|                                          | <p>residue 158 225 282 291</p> <p>HCV. 4wta ARLLIVY .GFSYDTRHFDSTV ASGVLTTSMGNITTCYVK CGDDL<br/> Zika. 5u0b SRRAIWY KMYADDTAGWDTRI GSGQVVTYALNITFTNLVV SGGDDC<br/> Polio. 3o19 SRLIEA .LFAFDYTGVDASL PSCSGTSIFNSMINNLI YGDDV<br/> FluB. 4wsa RRAIAT MTVTGDNTKWNDECL MMG.MFNMLSTVLGVAA SSDDF<br/> VSV. 5a22 GRFESL IANHIDYEKWNNHQ LEG.LRQKGTILNLLV QGDNQ</p> <p>motif F3 A B C</p> <p>VSV. 5A22 GRFFSL . ANHIDYEKWNNHQ L ECLRQKGTILNLLVIQ QGDNQ<br/> RSV. L. AAA84898 GRMFAM CSIITDLSKFNQAF IEGWQKQIWTIEAISLLD N GDNQ<br/> Ebola. L. AKG65102 GRTFGK SSFVTDLEKYNLAF IEGLOQKQIWTISISCAQIS M GDNQ</p> <p>742</p>                                                                                                                 |                                                                          |                                             |                                               |                                               |           |

| PURIFICATION                   |                                                                  |                     |                     |                     |             |      |
|--------------------------------|------------------------------------------------------------------|---------------------|---------------------|---------------------|-------------|------|
| AFFINITY TAG                   | Histidine                                                        | Streptavidin        | Streptavidin        | Histidine           |             |      |
| terminus                       | C                                                                | N                   | C                   | N                   |             |      |
| location                       | NS5b                                                             | NS5                 | PB2                 | P                   | vp35        | vp35 |
| WASH                           | NaCl, 500 mM                                                     | NaCl, 1000 mM       | NaCl, 1000 mM       | NaCl, 500 mM        |             |      |
| BUFFER                         | 40 cv                                                            | 60 cv               | 60 cv               | 60 cv               |             |      |
| Tween 20                       |                                                                  |                     |                     | 0.01, %             |             |      |
| Concentrator                   | 30 kDa                                                           | 50 kDa              | 30 kDa              | 100 kDa             |             |      |
| STORAGE                        | Tris, 50 mM, pH 8, NaCl, 75 mM, TCEP, 2 mM, Glycerol, 50%, final |                     |                     |                     |             |      |
| BUFFER                         |                                                                  |                     |                     |                     |             |      |
| RNA SYNTHESIS REACTION MIXTURE |                                                                  |                     |                     |                     |             |      |
| buffer                         | Tris, 25 mM, pH 8, NaCl, 20 mM, TCEP, 2 mM                       |                     |                     |                     |             |      |
| RNA substrate                  | Template, 1 $\mu$ M, Primer, 200 $\mu$ M                         |                     |                     |                     |             |      |
| NTP substrate                  | 1 $\mu$ M                                                        | 1 $\mu$ M           | 0.1 or 1 $\mu$ M    | 10 $\mu$ M          | 100 $\mu$ M |      |
| enzyme                         | 0.4 $\mu$ M                                                      | 0.1 $\mu$ M         | 0.1 $\mu$ M         | 0.2 $\mu$ M         | 2 uL        | 2 uL |
| reaction                       | MgCl <sub>2</sub> ,                                              | MnCl <sub>2</sub> , | MnCl <sub>2</sub> , | MgCl <sub>2</sub> , |             |      |
| start                          | 5 mM                                                             | 2.5 mM              | 2.5 mM              | 5 mM                |             |      |
| stop                           | Formamide, 95%, EDTA, 25 mM                                      |                     |                     |                     |             |      |

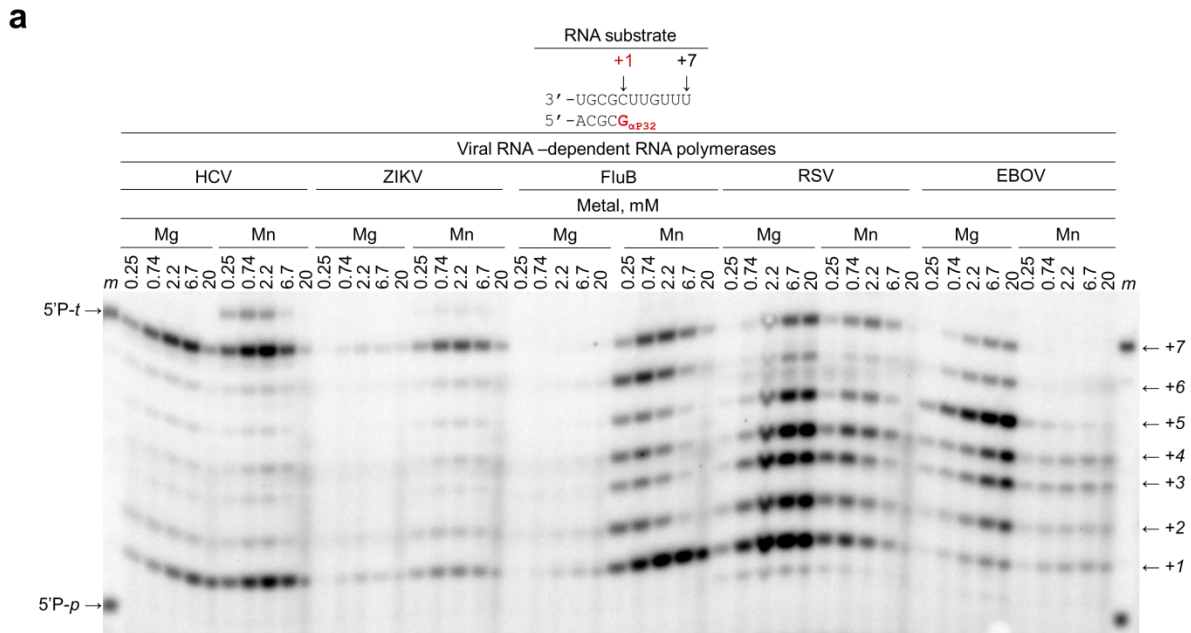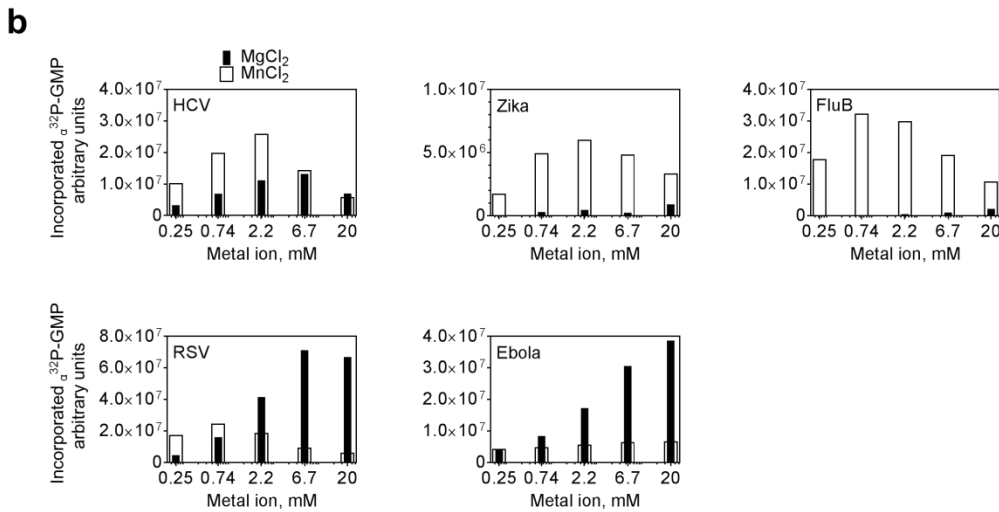

**Supplementary Figure 1.** RNA synthesis by viral RdRp as a function of di-valent metal ions concentration. **(a)** 15% denaturing PAGE migration pattern of 5'P-RNA primers extended through incorporation of nucleotides. RNA substrate consists of a 5'-phosphorylated primer and 11-nucleotide template. The template permits incorporation of a radio-labelled nucleotide ( $\alpha$ -<sup>32</sup>P-GTP,  $\alpha$ P32), which effectively labels the primer-extended products of the RNA synthesis. The reaction mixture contains ATP and CTP (**Supplementary Table 1**) nucleotide substrates which allows synthesis of a fully extended primer product position +7. Lane *m*, PAGE migration pattern of 5'-<sup>32</sup>P-labeled primer (5'P-*p*→) and template (5'P-*t*→) markers. **(b)** Graphical representation of the extent of RNA synthesis by viral RdRp as a function of di-valent metal ions concentration.

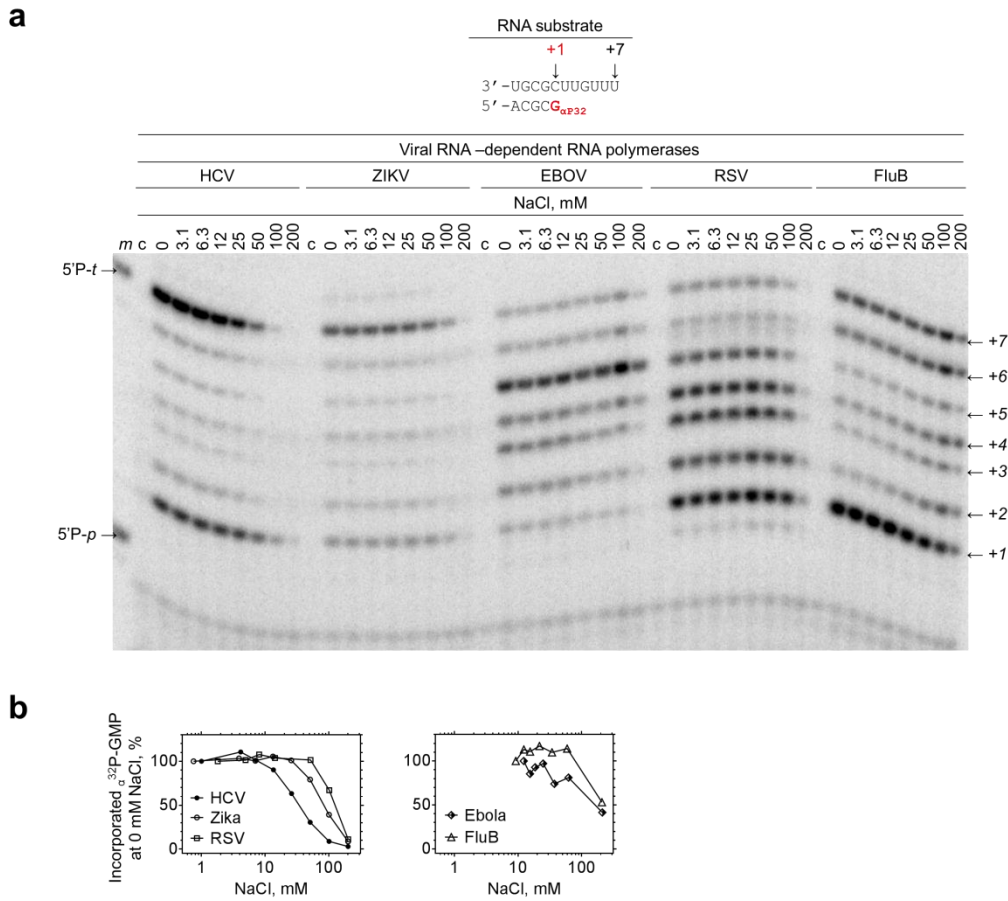

**Supplementary Figure 2.** RNA synthesis by viral RdRp as a function of mono-valent metal ion concentration. **(a)** 15% denaturing PAGE migration pattern of 5'P-RNA primers extended through incorporation of nucleotides. RNA substrate consists of a 5'-phosphorylated primer and 11-nucleotide template. The template permits incorporation of a radio-labelled nucleotide ( $\alpha$ - $^{32}P$ -GTP,  $G_{ap32}$ ), which effectively labels the primer-extended products of the RNA synthesis. The reaction mixture contains ATP and CTP (**Supplementary Table 1**) nucleotide substrates which allow synthesis of a fully extended primer product position +7.

*Lane m*, PAGE migration pattern of 5'- $^{32}P$ -labeled primer (5'P-p→) and template (5'P-t→) markers. *Lane c*, RNA synthesis by viral RdRp in the absence of di-valent metal ions. **(b)**

Graphical representation of the extent of RNA synthesis by viral RdRp as a function of mono-valent metal ion concentration.

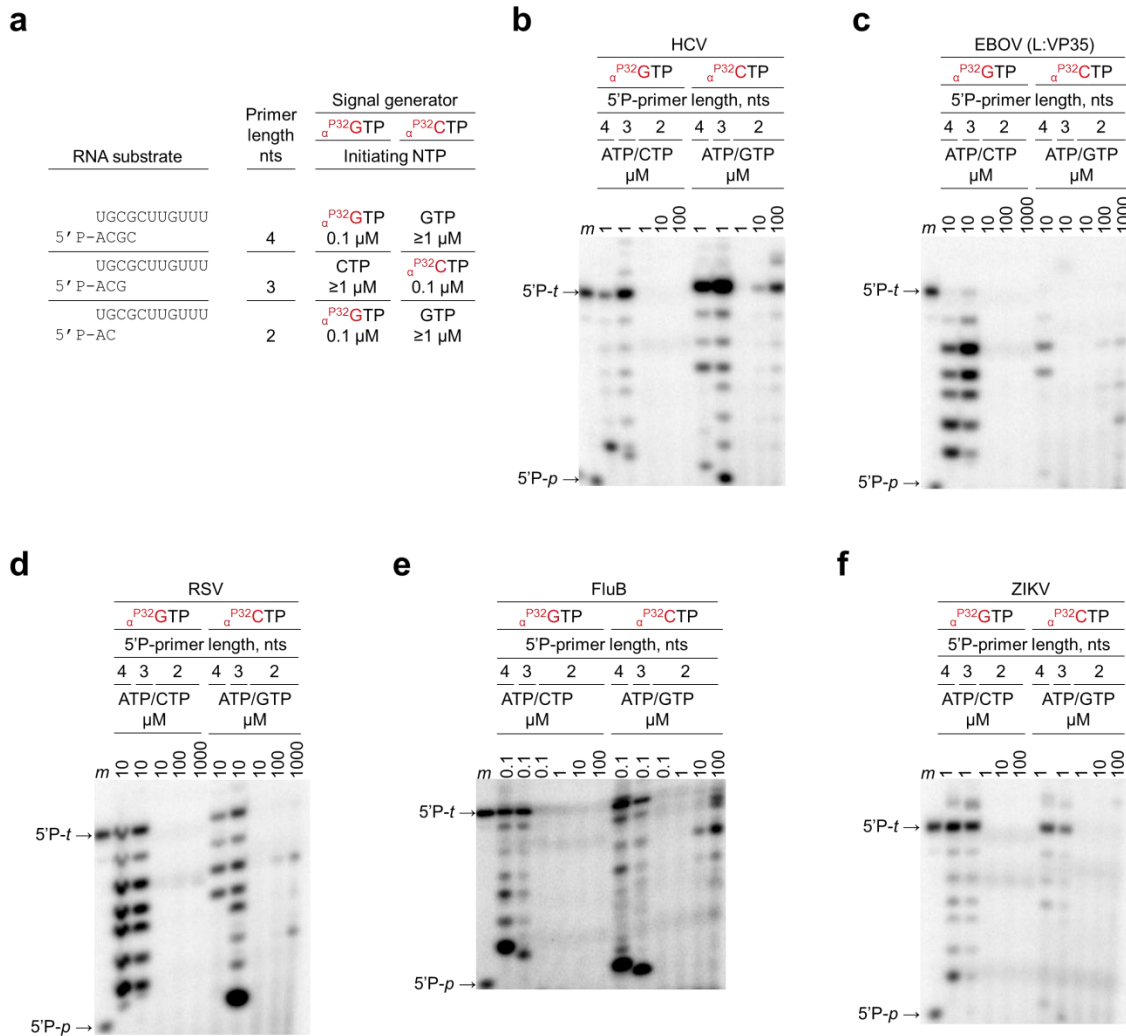

**Supplementary Figure 3.** RNA synthesis as a function of primer length. **(a)** RNA substrates are shown for different primer lengths: 4, 3, and 2. The reaction conditions are such that the concentration of the first nucleotide to be incorporated at the 3'-end of the primer (*initiating NTP*) changes as a function of primer length (*nts*, nucleotides) used in the reaction mixture. **(b-f)** RNA synthesis by viral RdRp as a function of 5'-phosphorylated primer length. 15% denaturing PAGE migration pattern of 5'-phosphorylated primers of various lengths extended through incorporation of nucleotides including radio-labeled  $\alpha$ - $^{32}\text{P}$ -GTP (left panel) or  $\alpha$ - $^{32}\text{P}$ -CTP (right panel). Lane *m*, 5'- $^{32}\text{P}$ -labeled primer (5'P-*p*→) and template (5'P-*t*→) markers.

native NTP substrate

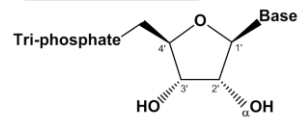

2'd-NTP

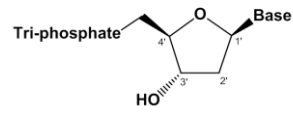

ara-NTP

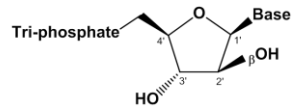

**Supplementary Figure 4.** Chemical structures of cytidine nucleotide substrate analogues used in the study.

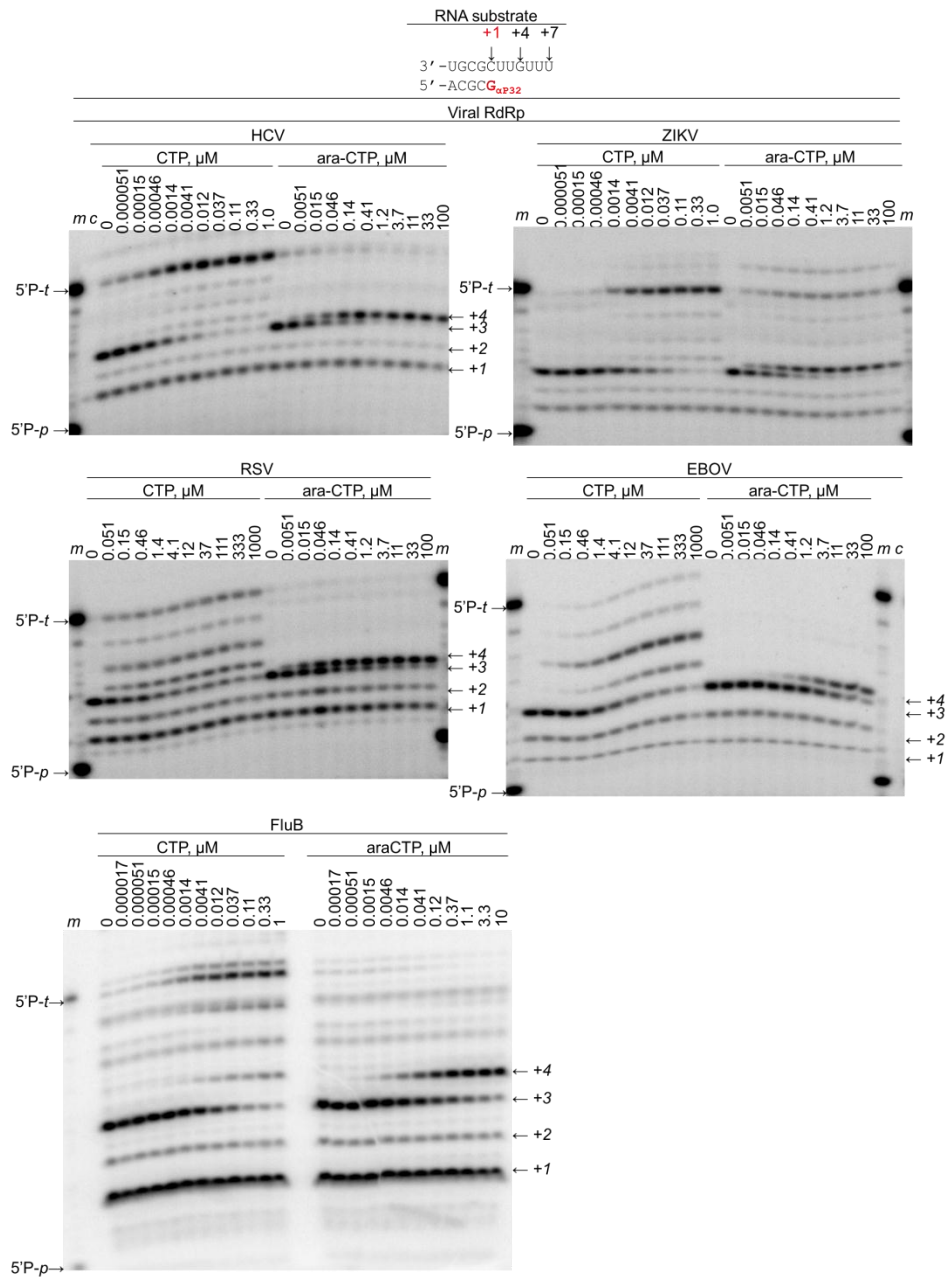

**Supplementary Figure 5.** RNA synthesis by viral RdRp as a function of incorporation of ara-CMP at position +4 with respect to RNA template. 20% denaturing PAGE migration pattern of products of reactions containing titrated nucleotide substrate concentrations of either CTP or ara-CTP. Lane *m*, PAGE migration pattern of 5'-<sup>32</sup>P-labeled primer (5'P-*p*→) and template (5'P-*t*→) markers.



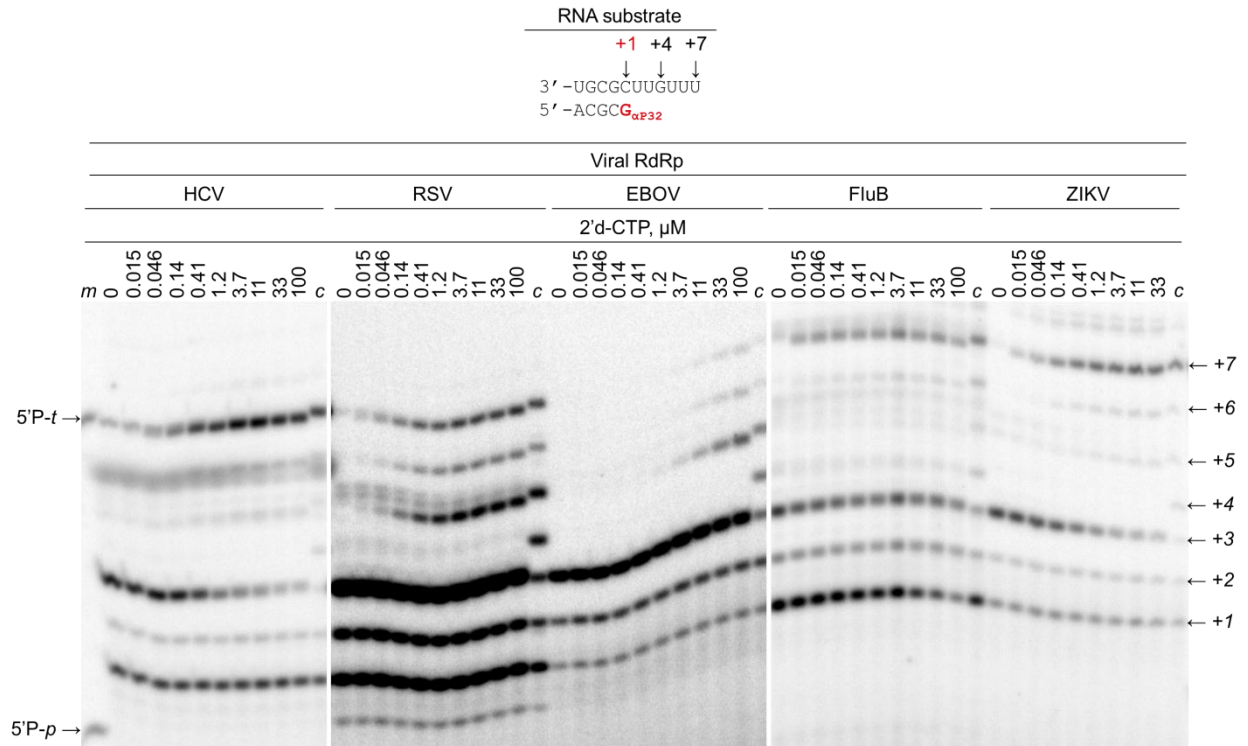

**Supplementary Figure 6.** RNA synthesis by viral RdRp as a function of incorporation of 2'd-CMP at position +4 with respect to RNA template. 20% denaturing PAGE migration pattern of products of reactions containing titrated nucleotide substrate concentrations of either CTP or ara-CTP. Lane *m*, PAGE migration pattern of 5'-<sup>32</sup>P-labeled primer (5'P-*p*→) and template (5'P-*t*→) markers.

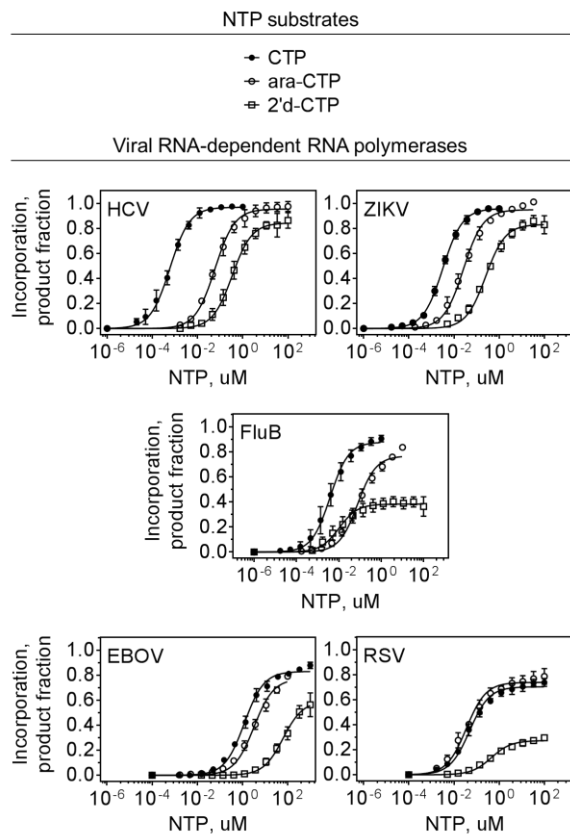

**Supplementary Figure 7.** Data quality and analysis of incorporation of ara-CMP and 2'd-CMP during RNA synthesis by viral RdRp. Error bars represent standard deviation of the data points determined on the basis of at least three independent experiments. Data points were fit to a Michaelis-Menten equation using Prism software (GrapPad). Michaelis-Menten parameters calculated from the fits are reported in **Table 1**.

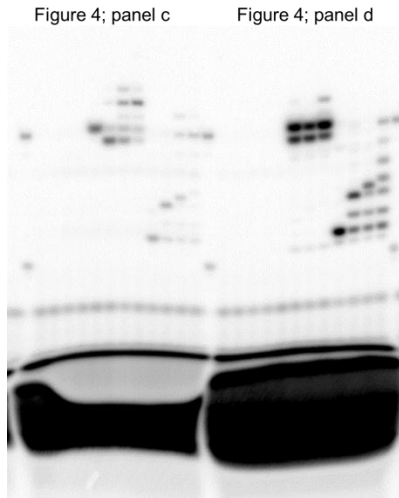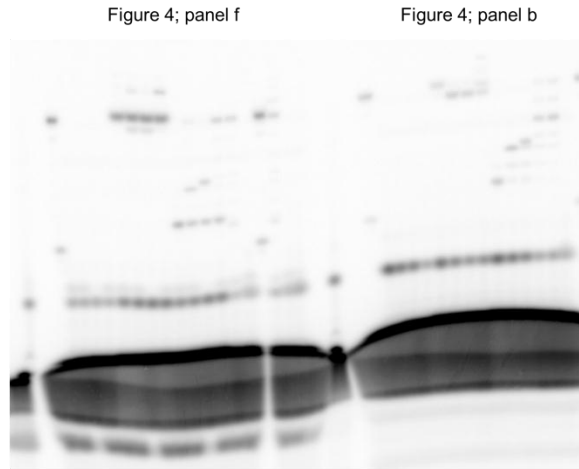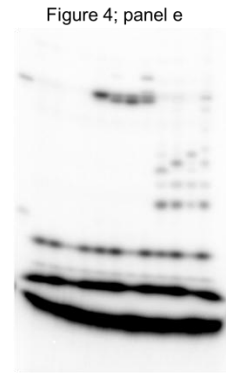

**Supplementary Figure 8.** Uncropped autoscaled images for panels in Figure 4.

## References.

1. Pettersen, E.F. et al. UCSF Chimera--a visualization system for exploratory research and analysis. *Journal of computational chemistry* 25, 1605-1612 (2004).
2. Notredame, C., Higgins, D.G. & Heringa, J. T-Coffee: A novel method for fast and accurate multiple sequence alignment. *Journal of molecular biology* 302, 205-217 (2000).
3. Robert, X. & Gouet, P. Deciphering key features in protein structures with the new ENDscript server. *Nucleic acids research* 42, W320-324 (2014).
4. Appleby, T.C. et al. Structural basis for RNA replication by the hepatitis C virus polymerase. *Science* 347, 771-775 (2015).
